# Supplementary material for: Navigating the social, ethical and legal challenges in the provision of in-vitro fertilization care services in Ghana: a qualitative study
Source: Research Square preprint supplement (doi:10.21203/rs.3.rs-7115119/v1), 2025-08-13
Supplement: Supplementary file 1 [file 1a963058fee58174d86071c4.docx]

# INTERVIEW GUIDE

This interview guide is designed to explore the ethical issues surrounding in vitro fertilization (IVF) treatment in Ghana, focusing on the experiences of both clients and service providers. The research seeks to examine the decision-making processes of couples undergoing IVF, the ethical challenges faced by healthcare providers, and the strategies employed to address these challenges.

The interview consists of structured and semi-structured questions divided into key sections. The demographic section gathers essential background information, while subsequent sections delve into specific aspects of ethical decision-making and challenges encountered in IVF practice. Participants’ insights will be instrumental in identifying potential areas for ethical improvement, policy development, and enhanced patient care in Ghana’s IVF landscape.

All responses will be treated with strict confidentiality, and participation is entirely voluntary. Your experiences and perspectives are highly valued and will contribute to a broader understanding of the ethical considerations in IVF treatment.

**HEALTH PROVIDERS INTERVIEW QUESTIONS**

**SECTION A - DEMOGRAPHIC INFORMATION**

Gender:

- Male
- Female

Age:

- Below 20 years
- 21 to 30 years
- 31 to 40 years
- 41 to 50 years
- Above 50 yeas

Educational Level:

- Below Senior High
- Senior High school
- Bachelor’s Degree
- Master’s Degree
- PhD Degree

Religion:

- Islam
- Christianity
- Traditional
- Other

Employment type

- Full time
- Part time
- Other

How long have your worked in the IVF unit of this facility?

- Less than 1 year
- 2 to 4 years
- 5 to 7 years
- 7 to 10 years
- More than 10 years

**SECTION B – HEALTH PROVIDER ETHICAL ISSUES**

1. What ethical challenges do as service providers commonly encounter when offering IVF treatment in Ghana?
2. Have your personal beliefs ever impeded the scientific medical method?
3. What about your religious beliefs
4. Are there any specific cultural or regulatory considerations in Ghana that contribute to ethical challenges in the provision of IVF treatment?
5. Can you provide examples of difficult ethical decisions you or your colleagues have faced while providing IVF treatment?
6. What concerns or fears did you have when deciding whether to provide IVF treatment?

**\**

**SECTION D – HEALTH PROVIDER DECISION MAKING**

1. What strategies do service providers in Ghana have in place to address ethical issues related to IVF treatment?
2. How do you promote transparency and informed decision-making among couples undergoing IVF treatment?
3. Are there formal mechanisms or ethical guidelines that guide your practice when dealing with ethical challenges in IVF treatment?
4. Can you discuss any successful approaches or interventions used to resolve ethical dilemmas in the context of IVF treatment?
5. Are there any specific ethical challenges you think require further discussion or reform within the Ghanaian context?

**PATIENTS INTERVIEW QUESTIONS**

**SECTION A - DEMOGRAPHIC INFORMATION**

Gender:

- Male
- Female

Age:

- Below 20 years
- 21 to 30 years
- 31 to 40 years
- 41 to 50 years
- Above 50 yeas

Educational Level:

- Below Senior High
- Senior High school
- Bachelor’s Degree
- Master’s Degree
- PhD Degree

Religion:

- Islam
- Christianity
- Traditional
- Other

How many IVFs have u done?

- Yes
- No

Do you have kids outside of IVF?

- Yes – How many?
- No

**SECTION B – FOR COUPLES**

1. What initially motivated you to consider IVF treatment?
2. What were the key factors you and your partner discussed before making the decision to pursue IVF? (e.g., financial implications, emotional impact, religious beliefs, societal expectations)
3. What fears did you have when deciding whether to seek IVF treatment? How did you reconcile them?
4. Did you encounter any external pressures or influences that affected your decision-making process? (e.g., family, friends, cultural norms)
5. How did you access information and resources about IVF options in Ghana? Did you find the information sufficient and reliable?
6. Did you participate in any pre-treatment counseling or support groups before or during your IVF journey? How did these resources impact your decision-making?
7. Did your personal believes about morality ever conflict with your decisions and how?
8. What about religious believes?
9. How do cultural, societal, and financial factors impact your decision-making process for seeking IVF treatment in Ghana?
